# Supplementary material
Source: MDPI journal article supplement (https://www.mdpi.com/2073-4344/11/11/1414)
Supplement: s1 [file s1 › catalysts-1415732-supplementary.pdf]

## Supporting Information

### Mott-Schottky measurement

During the measurement, 15 mg powders of BiVO<sub>4</sub>, Au-BiVO<sub>4</sub> and CoS-Au-BiVO<sub>4</sub> were separately dispersed in solution consisted of 20  $\mu$ L Nafion, 490  $\mu$ L ethanol and 490 pure water and deposited on FTO electrode. Then the samples were dried at 60°C and used as working electrodes. The electrode potential of the reference is +0.197 V, thus, the flat band of sample is calculated by

$$E_f(\text{vs NHE}) = \left( \text{vs } \frac{\text{Ag}}{\text{AgCl}} \right) + 0.1978$$

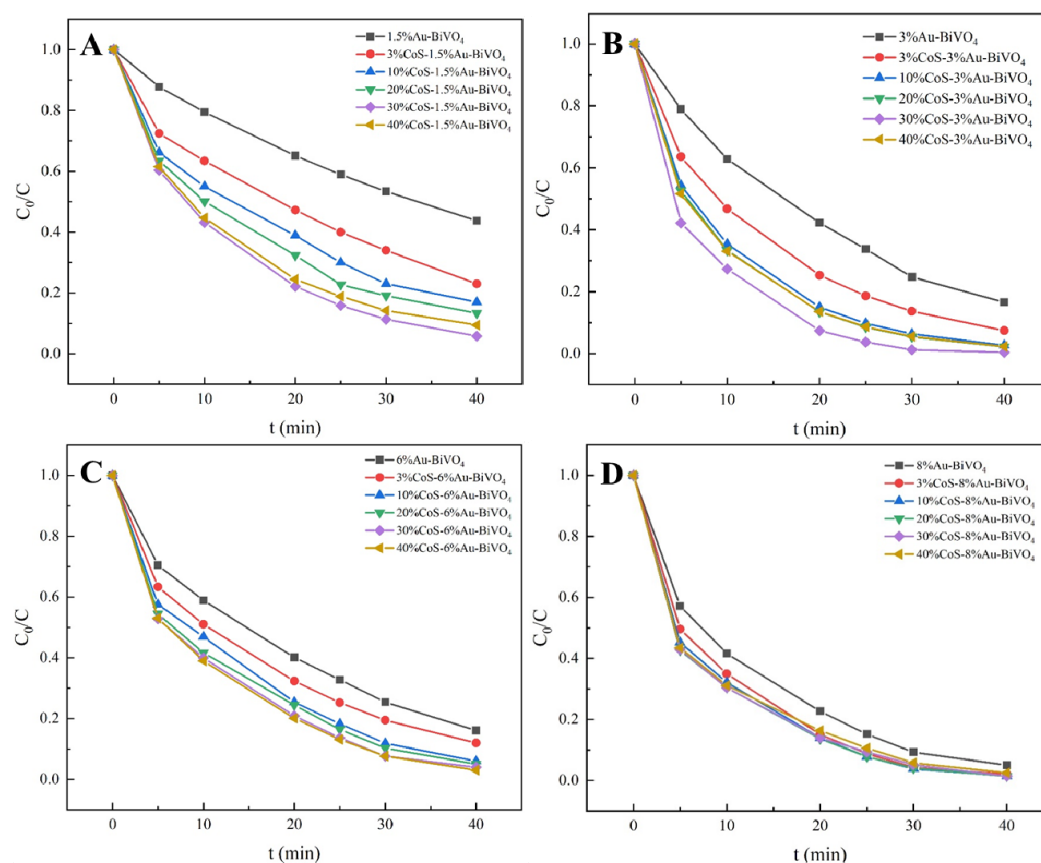

**Figure S1.** Photodegradation of RhB by different synthesized samples of (A) wt%CoS-1.5%Au-BiVO<sub>4</sub>, (B) wt%CoS-3%Au-BiVO<sub>4</sub>, (C) wt%CoS-6%Au-BiVO<sub>4</sub> and (D) wt%CoS-8%Au-BiVO<sub>4</sub>.

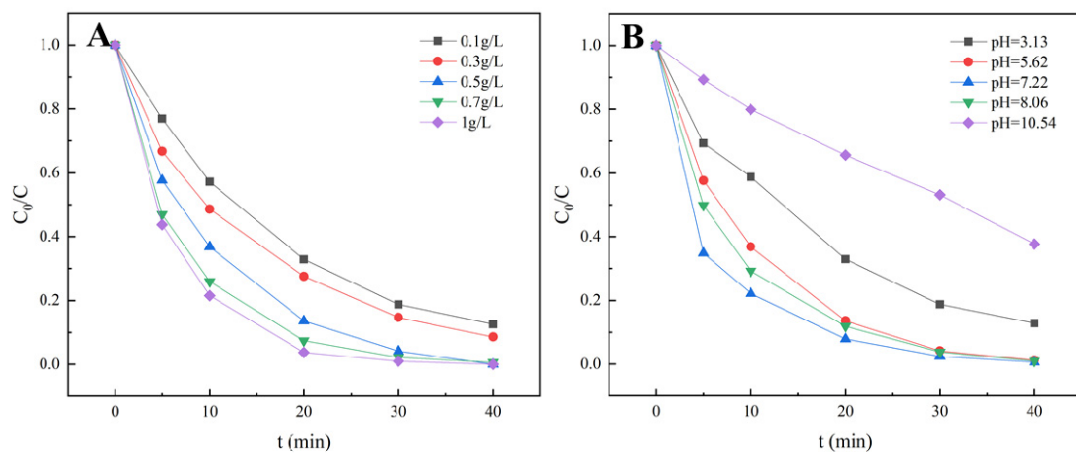

**Figure S2.** Effects of catalyst dosage (A) and pH (B) for degradation of RhB by CoS-Au-BiVO<sub>4</sub> /PMS/Vis.

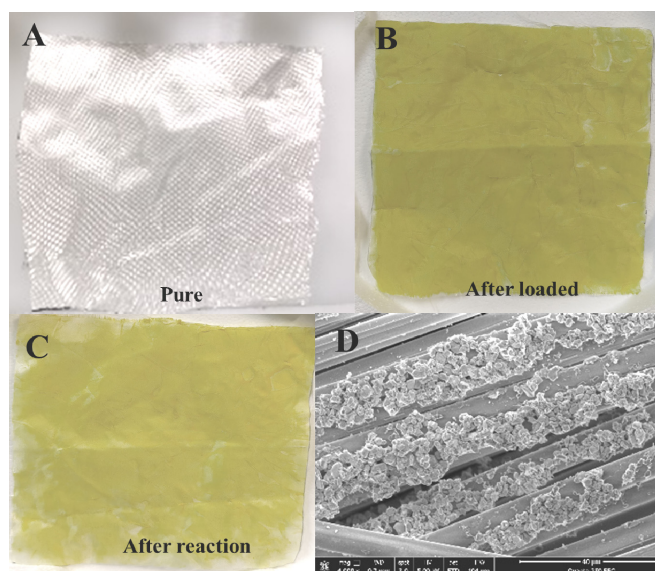

**Figure S3.** The pictures of pure and prepared glass fiber (A)~(B); The picture and SEM image of glass fiber after reaction (C)~(D).

**Table S1.** The atomic concentrations of elements in CoS-Au-BiVO<sub>4</sub>

| Elements             | Bi  | V   | O    | Au  | Co  | S   | C    |
|----------------------|-----|-----|------|-----|-----|-----|------|
| Atoms proportion (%) | 6.3 | 4.6 | 29.5 | 2.9 | 5.3 | 5.9 | 45.5 |

**Table S2.** The Co ion concentrations in solutions after cycling experiments

|                              | Cycle 1 | Cycle 2 | Cycle 3 |
|------------------------------|---------|---------|---------|
| Co ion concentrations/(mg/L) | 0.2     | 0.08    | 0       |

**Table S3.** Water quality parameters of wastewater

| Categories       | Parameters |
|------------------|------------|
| pH               | 5          |
| TOC              | 151 mg/L   |
| Dissolving salts | 36 mg/L    |
| Suspended solids | 8 mg/L     |

**Table S4.** The weight of photocatalysts in samples of C1~C5

| Samples | Weight of photocatalysts / g |
|---------|------------------------------|
| C1      | 0.13                         |
| C2      | 0.44                         |
| C3      | 0.64                         |
| C4      | 0.82                         |
| C5      | 0.99                         |
